# Supplementary material
Source: publisher site journal article supplement (https://www.dovepress.com/article/392504)
Supplement: Supplementary file 1 [file get_supplementary_file.php]

**Supplementary Table 1. The list of hospitals involved in this study**

| **No.** | **Name** | **Type of hospitals** | **Region** |
| --- | --- | --- | --- |
| 1 | Dalian Women and Children Hopital | Specific | Northeastern |
| 2 | Changchun Obstetrics-Gynecology Hospital | Specific | Northeastern |
| 3 | Jilin Women And Children Health Hopital | Specific | Northeastern |
| 4 | Affilated Maternity and Child Health Care Hospital of Nantong University | Specific | Eastern |
| 5 | South Hospital of the Sixth People's Hospital Affiliated to Shanghai Jiaotong University | General | Eastern |
| 6 | Obstetrics and Gynecology Hospital of Fudan University | Specific | Eastern |
| 7 | Foshan Women and Children Hopital | Specific | Eastern |
| 8 | Womem's Hospital School of Medicine Zhejiang University | Specific | Eastern |
| 9 | Shanghai Changzheng Hospital | General | Eastern |
| 10 | Guangzhou Women and Children's Medical Center | Specific | Eastern |
| 11 | Zaozhuang Women and Children Hopital | Specific | Eastern |
| 12 | Qingdao Women and Children Hopital | Specific | Eastern |
| 13 | The 2nd Affiliated Hospital and Yuying Children 's Hospital of WMU | General | Eastern |
| 14 | Shanghai Fifth People's Hospital, Fudan University | General | Eastern |
| 15 | Huaian Women and Children Hopital | Specific | Eastern |
| 16 | Shanxi Women And Children Health Hopital | Specific | Western |
| 17 | Liuzhou Women And Children Health Hopital | Specific | Western |
| 18 | Henan Provincial People's Hospital | General | Central |
| 19 | Hebei Women And Children Health Hopital | Specific | Central |
| 20 | Shanxi Women And Children Health Hopital | Specific | Central |
| 21 | Wuhan Children's Hospital | Specific | Central |
| 22 | The Fourth Hospital of Wuhan | General | Central |

**Supplementary Table 2. Antimicrobial agents used in this study**

| **Antimicrobial categories** | **ATC code** | **Antimicrobial a** |
| --- | --- | --- |
| **Parenteral antimicrobialb** | | |
| Tetracyclines | J01A | Tetracyclines |
| Beta-lactam Antibacterials,  Penicillins | J01C | Flucloxacillin; Mezlocillin; Piperacillin/Tazobactam; Benzylpenicillin |
| Other beta-lactam Antibacterials | J01D | Cefotiam; Cefamandole; Cefuroxime; Ceftriaxone; Cefoxitin; Cefoperazone/Tazobactam; Ceftazidime; Ceftriaxone; Cefotaxime;  Ceftizoxime; Ceftezole; Cefradine; Cefathiamdine; Cefazolin; Cefazedone; Cefmetazole; Cefprozil  Imipenem; Aztreonam |
| Macrolides, Lincosamides,  and streptogramins | J01F | Clindamycin; Erythromycin; |
| Quinolone antibacterials | J01M | Levofloxacin |
| Other antibacterials | J01X | Fosfomycin; Ornidazole; Metronidazole; |
| **Oral antimicrobial** | | |
| Beta-lactam Antibacterials,  Penicillins | J01C | Amoxicillin, Amoxicillin-clavulanate |
| Other beta-lactam Antibacterials | J01D | Cefdinir |
| Macrolides, Lincosamides,  and streptogramins | J01F | Erythromycin; Azithromycin |
| **Vaginal anti-infectives** | | |
| Antimycotics | J02 | Clotrimazole; Nifuratel; Metronidazole |

a Antimicrobial agent were coded in accordance with the Anatomical Therapeutic Chemical (ATC) classification system.

b Parenteral antimicrobial included antimicrobial agents administered via intravascular and intramuscularroutes.

**Supplementary Table 3. Disease and diagnosis involved in this study**

| **ICD-10** | **Disease** | **Diagnosis (Major criteria)** | **Numbers of patients** |
| --- | --- | --- | --- |
| I33 | Acute endocarditis | Positive blood culture; Evidence of endocardial involvement | 1 |
| J02 | Acute pharyngitis | Modified Centor criteria | 2 |
| J03 | Acute tonsillitis | Positive strep test | 3 |
| J06 | Acute upper respiratory infection | Positive throat swab | 44 |
| J18 | Pneumonia | chest x-ray | 6 |
| J20 | Acute bronchitis | Chest x-ray, Sputum tests | 26 |
| J22 | Acute lower respiratory tract infection | Swab, imaging, blood or pulmonary function tests | 15 |
| K29 | Gastritis and duodenitis | Blood or stool test, breath test, endoscopy test | 19 |
| K35 | Acute appendicitis | Physical examination, Blood test, Urine test, Imaging tests | 7 |
| K81 | Cholecystitis | Blood tests, Imaging tests showing gallbladder, A scan showing bile movement | 5 |
| L03 | Cellulitis | Physical examination | 1 |
| N00 | Acute Nephritic syndrome | Urine tests, Blood tests, Kidney biopsy | 12 |
| N30 | Cystitis | Urine analysis, cystoscopy, x-ray | 6 |
| N34 | Urethritis and urethral syndrome | X-ray studies, bladder studies | 7 |
| N70 | Salpingitis | Physical examination, blood tests and urine tests, vaginal or cervical culture | 1 |
| N71 | Uteritis | Physical examination, urine tests for gonorrhea, | 105 |
| N72 | Cervicitis | Pelvic exam, specimen collection | 14 |
| N73 | Pelvic inflammation | Pelvic exam, Blood and urine tests, Ultrasound | 13 |
| N76 | Vaginitis or vulvitis | Pelvic exam, test of cervical or vaginal discharge, pH testing | 84 |
